# Supplementary material for: The use of extracellular DNA as a proxy for specific microbial activity
Source: Springer Nature journal article supplement (doi:10.1007/s00253-018-8786-y), 2018-02-08
Supplement: MOESM1 [file 253_2018_8786_MOESM1_ESM-2.pdf]

Supplementary material

Applied Microbiology and Biotechnology

## **The use of extracellular DNA as a proxy for specific microbial activity**

Magdalena Nagler<sup>a\*</sup>, Sabine Marie Podmirseg<sup>a</sup>, Gareth Wyn Griffith<sup>c</sup>, Heribert Insam<sup>a</sup>, Judith Ascher-Jenuß<sup>ab</sup>

<sup>a</sup>Institute of Microbiology, Universität Innsbruck, Technikerstr. 25d, 6020 Innsbruck, Austria

<sup>b</sup>Dipartimento di Scienze delle Produzioni Agroalimentari e dell'Ambiente, Università degli Studi di Firenze, Piazzale delle Cascine 18, 50144 Firenze, Italy

<sup>c</sup>Institute of Biological, Environmental and Rural Sciences (IBERS), Aberystwyth University, Aberystwyth SY23 3DD, Wales UK

\*Corresponding author [magdalena.nagler@uibk.ac.at](mailto:magdalena.nagler@uibk.ac.at), tel. +43 512 507 51336

**Fig. S1** Gel electrophoreses images of the purified DNA for two replicates of the various DNA fractions for the fresh, intermediate and old fungal cultures. M = marker, IM = intermediate, ladder = ThermoFisher 50bp GeneRuler. fDNA= free external DNA, wbDNA= weakly bound external DNA, tbDNA= tightly bound external DNA, iDNA=internal DNA, totDNA= total DNA obtained by classical extraction approach, without previous elimination of exDNA.

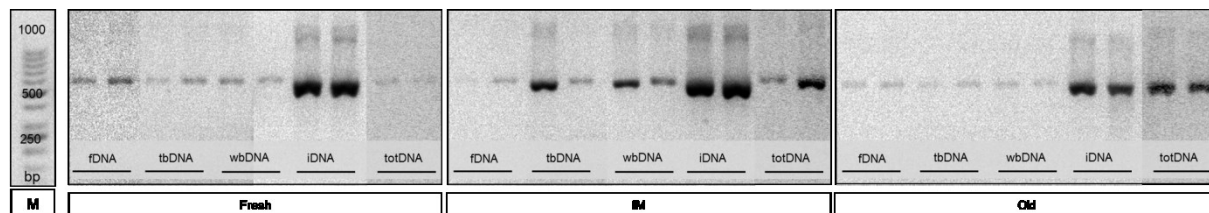

**Tab. S1** qPCR conditions and primers used in this study. FW = fresh weight

|                                                                        | <b>Total Bacteria</b>                        | <b>Total Methanogens</b>                    | <b>Anaerobic fungi<br/>(<i>Neocallimastigomycota</i>)</b> |
|------------------------------------------------------------------------|----------------------------------------------|---------------------------------------------|-----------------------------------------------------------|
| <b>Target</b>                                                          | Bacterial 16S rRNA gene                      | Universal <i>mcrA</i> gene                  | 28S rRNA gene                                             |
| <b>Forward primer</b>                                                  | 1055f                                        | mlas-mod-F                                  | GGNL1F                                                    |
| <b>Reverse primer</b>                                                  | 1392r                                        | <i>mcrA</i> -rev                            | GGNL4R                                                    |
| <b>Forward primer<br/>sequence (5'-3')</b>                             | ATGGCTGTCGTCAGCT                             | GGYGGTGTMGDDTTCA<br>CMCARTA                 | CATAGAGGGTGAGAA<br>TCCCGTA                                |
| <b>Reverse primer<br/>sequence (3'-5')</b>                             | ACGGGCGGTGTGTAC                              | CGTTCATBGCCTAGTT<br>VGGRTAGT                | TCAACATCCTAAGCG<br>TAGGTA                                 |
| <b>Amplicon size (bp)</b>                                              | 352                                          | 469                                         | 570                                                       |
| <b>Pure culture for<br/>standards</b>                                  | <i>Nitrosomonas europaea</i><br>(DSMZ 21879) | <i>Methanosarcina barkeri</i><br>(DSMZ 800) | <i>Caecomycetes communis</i><br>(SF011204) *              |
| <b>Range of standards</b>                                              | 10 <sup>7</sup> -10 <sup>2</sup>             | 10 <sup>5</sup> -10 <sup>1</sup>            | 10 <sup>5</sup> -10 <sup>1</sup>                          |
| <b>Detection limit (gene<br/>copies g<sup>-1</sup> FW<sup>a</sup>)</b> | 1.6 x10 <sup>5</sup>                         | 1.6 x10 <sup>3</sup>                        | 1.6 x10 <sup>3</sup>                                      |
| <b>Primer conc. (μM)</b>                                               | 0.8                                          | 1                                           | 0.6                                                       |
| <b>R<sup>2</sup> of standard curve</b>                                 | ≥0,999                                       | ≥0,998                                      | ≥0,999                                                    |
| <b>Reference</b>                                                       | Ferris et al. 1996                           | Angel et al. 2012                           | This study                                                |
| <b>Initial denaturation</b>                                            | 95 °C, 10 min                                | 95 °C, 10 min                               | 95 °C, 10 min                                             |
| <b>Nr. of cycles</b>                                                   | 40                                           | 45                                          | 45                                                        |
| <b>Denaturation</b>                                                    | 95°C, 20 s                                   | 95°C, 30 s                                  | 95°C, 25 s                                                |
| <b>Annealing</b>                                                       | 58°C, 15 s                                   | 66°C, 30 s                                  | 58°C, 20 s                                                |
| <b>Elongation</b>                                                      | 72°C, 30 s                                   | 72°C, 30 s                                  | 72°C, 30 s                                                |

\* WDCM collection number 919

<sup>a</sup>Fresh weight
